# Supplementary material for: Fluoropolymer/Glycidyl Azide Polymer (GAP) Block Copolyurethane as New Energetic Binders: Synthesis, Mechanical Properties, and Thermal Performance
Source: MDPI journal article supplement (doi:10.3390/polym13162706), 2021-08-13
Supplement: s1 [file s1]

## Supplementary Information

**Table S1.** Mechanical Properties of polymer film for SEM images in different literatures.

| Samples                                          | Raw materials                              | Stress (MPa) | Strain (%) | Dispersion of phase separation |
|--------------------------------------------------|--------------------------------------------|--------------|------------|--------------------------------|
| PBFMO- <i>b</i> -GAP                             | GAP, PBFMO, TDI                            | 5.75         | 1660       | Uniformly dispersion           |
| GAP-ETPE [1S]                                    | GAP, N-(2-cyanoethyl) diethanolamine, HMDI | 7.58         | 490        | Nearly uniformity              |
| poly(TFEE- <i>r</i> -GA) based polyurethane [40] | poly(TFEE- <i>r</i> -GA), TMP, IPDI        | 5.52         | 162.8      | Relative uniformity            |
| FGAP-based polyurethane [2S]                     | FGAP, Desmodur N-100                       | 1.5          | 81.6       | nonuniform                     |

### Supplementary References

- 1S. Z. Wang, T.F. Zhang, B.B. Zhao and Y.J. Luo, Effect of nitrocellulose (NC) on morphology, rheological and mechanical properties of glycidyl azide polymer based energetic thermoplastic elastomer/NC blends, *Polym. Int.* 66 (2017) 705-711.
- 2S. M.H. Xu, Z.X. Ge, X.M. Lu, H.C. Mo, Y.P. Ji and H.M. Hu, Structure and mechanical properties of fluorine-containing glycidyl azide polymer-based energetic binders, *Polym. Int.* 66 (9) (2017) 1318-1323.
